# Supplementary material for: Clinical Pathway and Monthly Feedback Improve Adherence to Antibiotic Guideline Recommendations for Community-Acquired Pneumonia
Source: PubMed Central journal article supplement (PMC4959693; doi:10.1371/journal.pone.0159467), 2016-07-25
Supplement: pone.0159467.s002.pdf [file pone.0159467.s002.pdf]

S2. Example of the feedback provided to the Physicians at the Royal Hobart Hospital

| Case# <sup>a</sup> | Use of Pathway | Severity of Pneumonia noted | Severity based on CORB <sup>b</sup> | Antibiotic regimen                            | Guideline concordant | Chest X Ray changes | Comments           |
|--------------------|----------------|-----------------------------|-------------------------------------|-----------------------------------------------|----------------------|---------------------|--------------------|
| 1                  | Yes            | Yes                         | Severe                              | Ceftriaxone 1 g IV and Azithromycin 500 mg IV | Yes                  | No                  |                    |
| 2                  | Yes            | Yes                         | Severe                              | Ceftriaxone 1 g IV and Azithromycin 500 mg IV | Yes                  | No                  | Penicillin allergy |
| 3                  | Yes            | Yes                         | Mild                                | Amoxicillin 1 g PO and Doxycycline            | No                   | No                  |                    |
| 4                  | Yes            | Yes                         | Mild                                | Amoxicillin 1 g PO                            | Yes                  | No                  |                    |
| 5                  | No             | Yes                         | Mild                                | Benzympenicillin 1.2 g IV                     | No                   | No                  |                    |
| 6                  | No             | No                          | Mild                                | Ceftriaxone 1 g IV and Doxycycline 200 mg PO  | No                   | Yes                 |                    |
| 7                  | No             | No                          | Mild                                | Amoxicillin 1 g IV                            | No                   | No                  | Discordant route   |
| 8                  | Yes            | Yes                         | Moderate                            | Ceftriaxone 1 g IV and Doxycycline 200 mg PO  | Yes                  | Yes                 | Penicillin allergy |
| 9                  | No             | No                          | Severe                              | Ceftriaxone 1 g IV and Azithromycin 500 mg IV | Yes                  | Yes                 |                    |
| 10                 | No             | No                          | Mild                                | Amoxicillin 1 g PO                            | Yes                  | No                  |                    |

<sup>a</sup> Actual patient record's number is replaced with a case# to protect patients privacy

<sup>b</sup> CORB is an acronym for confusion, oxygen level, respiratory rate and blood pressure level (systolic and diastolic)
